# Supplementary material for: Practical Minimum Energy Use of Seawater Reverse Osmosis Facilities
Source: Research Square preprint supplement (doi:10.21203/rs.3.rs-3909458/v1), 2024-02-07
Supplement: Supplementary file 1 [file 088ade220423638bf8d24c9a.docx]

SWRO dataset tables: Practical Minimum Energy Use of Seawater Reverse Osmosis Facilities

Sultan Alnajdia,e, Ali Nader Benia, Albraa Alsaatib, Mitul Luhard, Amy E. Childressc, David M. Warsingera,*

aSchool of Mechanical Engineering and Birck Nanotechnology Center, Purdue University, West Lafayette, 47907, IN, United States

bIntel Corporation, Chandler, 85226, AZ, United States

cSonny Astani Department of Civil and Environmental Engineering, University of Southern California, Los Angeles, 90089, CA, United States

dViterbi School of Engineering, University of Southern California, Los Angeles, 90089, CA, United States

eMechanical Engineering Department, Kuwait University, Kuwait City, 13060, , The State of Kuwait

∗ Email address: dwarsing@purdue.edu

Table S.1: Dataset of the 64 globally complied RO facilities: recovery, ERD types, and SEC

| **No.** | **Plant/ location/ Online date** | **Capacity (m3/d)** | **Feedwater temp (C)** | **Feedwater**  **salinity (mg/L)** | **Permeate quality (mg/L)** | **Recovery (%)** | **Stage** | **RO configuration** | **SEC (kWh/m3)** | **ERD** | **SECRO**  **(kWh/m3)** | **Ref.** |
| --- | --- | --- | --- | --- | --- | --- | --- | --- | --- | --- | --- | --- |
| 1 | Adelaide/ Australia/  2012 | 300000 | 18 | 37200 | 200 | 0.49 | Single | Partial Two | 3.6 | Isobaric | Unknown | [1–4] |
| 2 | Alicante 1/ Spain/ 2006 | 57300 | 21 | 38000 | 400 | 0.45 | Single | Single | 4.52 | Turbine | Unknown | [4–6] |
| 3 | Alicante 2/ Spain/2008 | 65000 | 20 | 38000 | 400 | 0.43 | Single | Single | 3.8 | Isobaric | 2.5 | [3,4,6] |
| ~~4~~ | Aruba 1/ Aruba/ 2008 | 8000 | 28 | 41867 | <30 | 0.38 | Unknown | Two | 4 | Isobaric | Unknown | SWRO Project data |
| 5 | Aruba 2/ Aruba/  2012 | 24000 | 27 | 36000 | <15 | 0.43 | Single | Two | 3.8 | Isobaric | Unknown | [3,7,8] |
| 6 | Ashkelon/ Israel/ 2005 | 330000 | 22 | 40679 | <80 | 0.427 | Single | Partial Two | 3.45 | Isobaric | 3 | [3,9,10] |
| 7 | Barcelona-Llobregat/ Spain/ 2009 | 200000 | 19 | 39700 | 130 | 0.38 | Single | Partial Two | 4.2 | Isobaric | 2.6 | [3,11,12] |
| 8 | Carlsbad/ California/ 2015 | 189270 | 23 | 33500 | 200 | 0.5 | Single | Partial Two | 3.6 instead of 3.3 | Isobaric | 2.7* | [3,4,13,14] |
| 9 | Al Fujairah 1/ UAE/ 2004 | 170500 | 28 | 38300 | <180 200 | 0.387 | Single | Partial Two | 4.5 | Turbine | 3.8 | [4,15,16] |
| 10 | Gold Coast/ Australia/ 2009 | 133000 | 23 | 38000 | 220 | 0.45  0.38 | Two/  Single | Partial Two | 3.6 | Isobaric | 3 | [3,4,17,18] |
| 11 | Hadera/ Israel/ 2009 | 368000 | 20 | 38000 | 450 | 0.45 | Single | Partial Two | 4.0 | Isobaric | 2.7 | [3,4,19,20] |
| 12 | Perth SSDP 2/ Australia/ 2013 | 306000 | 20 | 36500 | 200 | 0.45 | Single | Partial Two | 3.5 | Isobaric | 2.9 | [3,4,21,22] |
| 13 | Point Lisas/ Trinidad/ 2002 | 109,104 | 27 | 29000 | 85 | 0.5 | Single | Two | 3.8 | Turbine | Unknown | [23–26] |
| 14 | Saudia City/ Saudi Arabia/ 2011 | 10000 | 28 | 43700 | <500 | 0.43 | Unknown | Single | 2.5 | Isobaric | Unknown | SWRO Project data |
| 15 | Shoaiba (Shuaibah)/ Saudi Arabia/ 2009 | 150000 | 30 | 44460 | 45 | 0.42 | Single | Two | 4.7 | Isobaric | Unknown | [3,4,27,28] |
| 16 | Shuqaiq/ Saudi Arabia/ 2009 | 212000 | 29 | 37100 | 30 | 0.40 | Single | Two | 4.4 | Turbine | Unknown | [3,4,29,30] |
| 17 | Singapore SingSpring/ Singapore/ 2005 | 136400 | 31 | 31600 | 250 | 0.45 | Single | Partial Two | 4.1 | Isobaric | 3.1 | [3,4,10,31,32] |
| 18 | Skikda/ Algeria/ 2008 | 100000 | 23 | 39325 | <450 | 0.47 | Single | Single | 3.56 | Isobaric | Unknown | [3,4,33] |
| 19 | Tampa Bay/ Florida/ 2007 | 108820 | 26 | 32000 | <500 | 0.42 | Single | Two | 2.96 | Turbine | Unknown | [34–36] |
| 20 | Sand City/ California/ 2010 | 2271 | - | 24000 | <200 | 0.33 | Unknown | Single | 1.85 | Isobaric | Unknown | SWRO Project data |
| 21 | Haley Plant/ US Virgin Isles/ 2013 | 12490 | 29 | 35000 | <500 | 0.4 | Unknown | Single | 2.9 | Isobaric | Unknown | SWRO Project data |
| 22 | Taweelah/ UAE/ 2022 | 909200 | 35 | 45000 | <200 | 0.4 | Unknown | Two | 3.016 | Isobaric | Unknown | SWRO Project data |
| 23 | Sur/ Oman/ 2009 | 80000 | 25 | 39700 | 123 | 0.42 | Single | Two | 3.6 | Other | Unknown | [3] |
| 24 | Chennai-Minjur/ India/ 2010 | 100000 | 28 | 37100 | 400 | 0.45 | Unknown | Single | 2.9 | Isobaric | Unknown | [4,37–39] |
| 25 | Beni Saf/ Algeria/ 2010 | 200000 | 21 | 39000 | 400 | 0.45 | Single | Single | 4 | Isobaric | 2.3 | [3,4,40] |
| 26 | Nemmeli/ India/ 2013 | 100000 | 28 | 40000 | 300 | 0.45 | Single | Single | 3.9 | Isobaric | 2.7 | [3,4,41,42] |
| 27 | San Pedro de Pinatar I/ Spain/ 2005 | 65000 | 28 | 40916 | 400 | 0.45 | Single | Single | 4.2 | Turbine | Unknown | [3,4,43,44] |
| 28 | Rabigh IWSPP/ Saudi Arabia/ 2008 | 192000 | 29 | 41200 | 10 | 0.39 | Single | Three | 4.8 | Turbine | Unknown | [3,4,45] |
| 29 | Larnaca/ Cyprus/ 2001 | 54000 | 23 | 40300 | 500 | 0.39 | Single | Partial Two | 4.52 | Turbine | Unknown | [3,4,46,47] |
| 30 | Dhekelia 1-2/ Cyprus/ 2004 | 40000 | 25 | 42000 | 350 | 0.46 | Single | Single | 5.3 | Turbine | Unknown | [3,4,48] |
| 31 | Almeria City/ Spain/ 2003 | 50000 | 20 | 39000 | 400 | 0.45 | Single | Two | 4.2 | Turbine | Unknown | [3,4,49,50] |
| 32 | Fukuoka/ Japan/ 2005 | 59940 | 20 | 35000 | 200 | 0.51 | Two/  Single1 | Partial Two | 5.5 | Turbine | Unknown | [3,4,51–53] |
| 33 | Gijang/ Korea/ 2014 | 45500 | 19 | 36500 | 250 | 0.48 | Single | Partial Two | 3.9 | Isobaric | Unknown | [3,4,54–56] |
| 34 | Melbourne/ Australia/ 2012 | 450000 | 16 | 37100 | 300 | 0.48 | Single | Partial Two | 4.6 | Isobaric | Unknown | [3,4,57,58] |
| 35 | El Colosco/ Chile/ 2006 | 45360 | 17 | 36500 | 400 | 0.45 | Single | Single | 4.3 | Turbine | 3.4 | [3,4,59] |
| 36 | Aguilas-Guadalentin/ Spain/ 2013 | 212000 | 20 | 39500 | 400 | 0.4 | Single | Partial Two | 4.6 | Isobaric | 2.9 | [3,4] |
| 37 | Valdelentisco/ Spain/ 2010 | 140000 | 21 | 39000 | 400 | 0.5 | Two | Single | 3.7 | Isobaric | 3.1 | [3,4,60] |
| 38 | Al Dur/ Bahrain/ 2012 | 218000 | 28 | 47000 | 200 | 0.38 | Single | Two | 5.4 | Isobaric | 4.7 | [3,4,61,62] |
| 39 | Palmachim/ Israel/ 2007 | 110000 | 25 | 42000 | 300 | 0.45 | Single | Partial Two | 3.5 | Turbine | 2.9 | [3,4,63,64] |
| 40 | Sadra/ Saudi Arabia/ 2016 | 178600 | 27 | 45000 | 40 | 0.45 | Single | Two full/Partial Two2 | 4.4 | Isobaric | 3.1 | [3,4,65,66] |
| 41 | Yanbu/ Saudi Arabia/ 2006 | 50400 | 28 | 46400 | 500 | 0.39 | Single | Single | 5.2 | Turbine | Unknown | [3,4,67] |
| 42 | Ghalilah/ UAE/ 2015 | 68200 | 27 | 42000 | 500 | 0.4 | Single | Single | 3 | Isobaric | Unknown | [3,4,66,68] |
| 43 | Sorek/ Israel/ 2013 | 540000 | 25 | 40800 | 300 | 0.45 | Single | Partial Two | 3.5 | Isobaric | 2.7 | [3,4,69,70] |
| 44 | Jorf Lasfar/ Morocco/ 2014 | 75800 | 30 | 38000 | Unknown | 0.45 | Single | Partial Two | 3.8 | Isobaric | Unknown | [71,72] |
| 45 | Arucas Moya/ Spain/ 2009 | 15000 | 25 | 37100 | <400 | 0.45 | Single | Single | 3.4 | Isobaric | Unknown | [73,74] |
| 46 | Caofeidian/ China/ 2012 | 50000 | 14 | 36000 | Unknown | 0.45 | Single | Single | 4 | Other | Unknown | [3,4] |
| 47 | Yuhuan Power Plant/ China/ 2006 | 34600 | 24 | 34000 | <20 | 0.45 | Single | Two | 3.8 | Isobaric | Unknown | [4,75] |
| 48 | La Chimba/ Chile/ 2003 | 52000 | 17 | 36000 | Unknown | 0.52 | Single | Single | 4.2 | Turbine | Unknown | [76–78] |
| 49 | Campo de dalias/ Spain/ 2015 | 97200 | 19 | 39800 | Unknown | 0.47 | Single | Partial Two | 4 | Isobaric | Unknown | [79,80] |
| 50 | Ras Abu Fontas A3/ Qatar/ 2017 | 164000 | 25 | 45900 | Unknown | 0.43 | Single | Two | 4.5 | Isobaric | Unknown | [75] |
| 51 | Khorfakkan/ UAE/ 2008 | 22700 | 28 | 37400 | Unknown | Unknown | Single | Single | 4 | Isobaric | Unknown | [4,75,80] |
| 52 | Layyah/ UAE/2008 | 22700 | 28 | 37400 | <450 | 0.42 | Single | Single | 4 | Isobaric | Unknown | [3,4,75] |
| 53 | Palm Jumeriah/ UAE/2005 | 64000 | 28 | 42000 | Unknown | 0.35 | Single | Two | 4.1 | Isobaric | Unknown | [3,72] |
| 54 | Tuaspring/ Singapore/ 2013 | 318500 | 29 | 31600 | 250 | 0.405 | Single | Partial Two | 4 | Isobaric | 3.1 | [3,4,31,81–83] |
| 55 | Carboneras/ Spain/ 2005 | 120000 | 22 | 38000 | <400 | 0.45 | Single | Single | 4.3 | Turbine | Unknown | [3,4,84] |
| 56 | Marsa Matroush/ Egypt/ 2013 | 24000 | Unknown | 38700 | 200 | Unknown | Single | Single | 3.1 | Isobaric | 2.2 | [3,74,85] |
| 57 | Los Cabos/ Mexico/ 2006 | 20700 | Unknown | 30900 | <400 | 0.49 | Single | Single | 3.5 | Isobaric | Unknown | [3,75,86] |
| 58 | Curacao/ Curacao/2000 | 10200 | Unknown | 37900 | <40 | 0.58 | Single | Two | 4.2 | Turbine | 2.6 | [87] |
| 59 | San Pedro de Pinatar II/Spain/2006 | 65000 | Unknown | Unknown | Unknown | 0.45 | Single | Single | 3.8 | Isobaric | Unknown | [3,75] |
| 60 | Tordera/Spain/  2002 | 28000 | Unknown | 37500 | <500 | 0.45 | Single | Single | 4.5 | Turbine | 3.1 | [4] |
| 61 | Torrevieja/ Spain/ 2013 | 240000 | Unknown | Unknown | Unknown | 0.43 | Single | Two | 4.7 | Isobaric | 3 | [4] |
| 62 | Las palma III/Spain/ 2011 | 86000 | Unknown | Unknown | 260 | 0.5 | Unknown | Unknown | 4.1 | Isobaric | 2.3 | [3,75,88] |
| 63 | Maspalomas II/ Spain/ 2001 | 26200 | Unknown | 39400 | 350 | 0.6 | Single | Two | 3.8 | Turbine | Unknown | [3,75,86] |
| 64 | Perth I (Kwinana)/Australia/2006 | 143700 | 29 | 35000 | 30 | 0.405 | Single | Partial Two | 3.9 | Isobaric | 2.4 | [3,4,89,90] |

-= not available; * = value selected from bandwidth study (2017); 1 = Kim et al. (2019) shows that the treatment plant located in Sadra (Saudi Arabia) have two full pass/partial two passes; the treatment plant situated in Fukuoka (Japan) is a single stage as per the Kim et al. (2019), whereas bandwidth table shows it has two stages.

Table S.2: Dataset of the 39 globally complied RO facilities: Intake type, pre-treatment type, recovery, ERD types, and SEC

| Index | Plant/country/year | Intake type | | Pretreatment type | | | | | | | | ERD type | Pass | Stage ( each pass) | Capacity (m3/day) | Total dissolved solids (ppm) | | Recovery | Temperature (ºC) | SECplant (kWh/m3) | SECRO (kWh/m3) | Ref. |
| --- | --- | --- | --- | --- | --- | --- | --- | --- | --- | --- | --- | --- | --- | --- | --- | --- | --- | --- | --- | --- | --- | --- |
| Open-ocean screened | Subsurface beach wells | Cartridge filter | Flocculation and coagulation | Sand filtration | Dissolved air flotation | Dual media filtration | Ultrafiltration | Microfiltration | Disc filtration | Feed water | Product water |
| 1 | Tuaspring/Singapore/2013 | ✓ |  |  | ✓ |  | ✓ |  | ✓ |  |  | DWEER | 2 (partial two pass) | 1 | 318,500 | 31,600 | 250 | 0.405 | 29 | 4 | 3.1 | [3,4,81,82] |
| 2 | Skikda/Algeria/2008 | ✓ |  | ✓ | ✓ | ✓ |  |  |  |  |  | PX | 1 | 1 | 100,000 | 39,332 | 450 | 0.47 | 22 | 3.56 | --- | [3,4,33] |
| 3 | Perth I (Kwinana)/Australia/2006 | ✓ |  | ✓ | ✓ |  |  | ✓ |  |  |  | PX | 2 (partial two pass) | 1 | 143,700 | 35,000 | 30 | 0.405 | 20 | 3.9 | 2.4 | [3,4,89,90] |
| 4 | Point Lisas/Trinidad & Tobago/2002 | ✓ |  | ✓ | ✓ | ✓ |  |  |  |  |  | PT | 2 | * | 109,104 | 29,000 | 85 | 0.505 | 28 | 3.8 | --- | [23–26] |
| 5 | Carboneras/Spain/2005 | ✓ |  |  | ✓ |  |  | ✓ |  |  |  | PT | 1 | 1 | 120,000 | 38,000 | 400 | 0.45 | 22 | 4.3 | --- | [3,4,84] |
| 6 | Chennai-Minjur/India/2010 |  | ✓ |  | ✓ |  |  | ✓ |  |  |  | PX | --- | --- | 100,000 | 37,100 | 400 | 0.45 | 28 | 2.9 | --- | [4,37–39] |
| 7 | Carlsbad/USA/2015 | ✓ |  |  | ✓ |  |  | ✓ |  | ✓ |  | PX | 2 (SPSP) | 1 | 189,270 | 33,500 | 200 | 0.5 | 22 | 3.3 | 2.7 | [3,4,13,14] |
| 8 | Beni Saf/Algeria/2010 | ✓ |  | ✓ | ✓ | ✓ |  |  |  | ✓ |  | PX | 1 | 1 | 200,000 | 39,000 | 400 | 0.45 | 21 | 4 | 2.3 | [3,4,40] |
| 9 | Nemmeli/India/2013 | ✓ |  |  | ✓ |  |  |  | ✓ |  | ✓ | PX | 1 | 1 | 100,000 | 40,000 | 300 | 0.45 | 28 | 3.9 | 2.7 | [3,4,41,42] |
| 10 | Hadera/Israel/2009 | ✓ |  | ✓ | ✓ |  |  | ✓ |  |  |  | PX | 2 (SPSP) | 1 | 368,000 | 38,000 | 450 | 0.45 | 20 | 4.5 | 2.7 | [3,4,19,20] |
| 11 | Ashkelon/Israel/2005 | ✓ |  |  | ✓ | ✓ |  |  |  |  |  | DWEER | 2 (SPSP) | 1 | 330,000 | 40,680 | 300 | 0.4275 | 22 | 3.45 | 3 | [4,91–95] |
| 12 | San Pedro de Pinatar I/Spain/2005 |  | ✓ |  | ✓ |  |  | ✓ |  |  |  | PT | 1 | 1 | 65,000 | 40,916 | 400 | 0.45 | 38 | 4.2 | --- | [3,4,43,44] |
| 13 | Shoaiba 3 Expansion 1/Saudi Arabia/2009 | ✓ |  |  | ✓ |  |  |  | ✓ |  |  | PX | 2 | 1 | 150,000 | 44,600 | 57 | 0.378 | 30 | 4.7 | --- | [3,4,27,28] |
| 14 | Alicante I/Spain/2006 |  | ✓ |  | ✓ |  |  |  |  |  |  | PT | 1 | 1 | 57,300 | 42,500 | 400 | 0.45 | 21 | 4.85 | --- | [4–6] |
| 15 | Rabigh IWSPP/Saudi Arabia/2008 | ✓ (assumed) |  |  | ✓ |  |  | ✓ |  |  |  | PT | 3 | 1 | 192,000 | 41,200 | 10 | 0.3913 | 29 | 4.8 | --- | [3,4,45] |
| 16 | Larnaca/Cyprus/2001 | ✓ |  | ✓ | ✓ | ✓ |  |  |  |  |  | PT | 2 (SPSP) | 1 | 54,000 | 40,300 | 500 | 0.39 | 23 | 4.52 | --- | [3,4,46,47] |
| 17 | Dhekelia 1-2/Cyprus/2004 | ✓ |  | ✓ | ✓ |  |  | ✓ |  |  |  | FT | 1 | 1 | 40,000 | 42,000 | 350 | 0.46 | 22 | 5.3 | --- | [3,4,48] |
| 18 | Al Fujairah 1/UAE/2004 | ✓ |  | ✓ | ✓ |  |  | ✓ |  |  |  | PT | 2 (partial two pass) | 1 | 170,500 | 40,000 | 200 | 0.387 | 28 | 4.8 | 3.8 | [4,15,16] |
| 19 | Almeria City/Spain/2003 |  | ✓ | ✓ | ✓ |  |  | ✓ |  |  |  | PT | 2 | 1 | 50,000 | 39,000 | 400 | 0.45 | 20 | 4.2 | --- | [3,4,49,50] |
| 20 | Fukuoka/Japan/2005 |  | ✓ |  | ✓ | ✓ |  |  | ✓ |  |  | PT | 2 (partial two pass) | 2 | 59,940 | 35,000 | 200 | 0.51 | 20 | 5.5 | --- | [3,4,51–53] |
| 21 | Tugun (Gold Coast)/Australia/2009 | ✓ |  |  | ✓ | ✓ |  | ✓ |  |  |  | DWEER | 2 (SPSP) | 1 | 133,000 | 38,000 | 220 | 0.3825 | 23 | 3.6 | 3 | [3,4,17,18] |
| 22 | Gijang/Korea/2014 | ✓ |  | ✓ | ✓ | ✓ |  |  | ✓ |  |  | DWEER | 2 (SPSP) | 1 | 45,500 | 45,500 | 250 | 0.4368 | 19 | 3.9 | --- | [3,4,54–56] |
| 23 | Adelaide (Port Stanvac)/Australia/2012 | ✓ |  |  | ✓ |  |  |  | ✓ |  | ✓ | PX | 2 (SPSP) | 1 | 300,000 | 37,200 | 200 | 0.49 | 18 | 3.6 | --- | [1–4] |
| 24 | Melbourne/Australia/2012 | ✓ |  |  | ✓ |  |  | ✓ |  |  |  | PX | 2 (partial two pass) | 1 | 450,000 | 37,100 | 300 | 0.432 | 16 | 4.6 | --- | [3,4,57,58] |
| 25 | Perth II (Southern)/Australia/2013 | ✓ |  | ✓ | ✓ | ✓ |  |  |  |  |  | PX | 2 (SPSP) | 1 | 306,000 | 36,500 | 200 | 0.405 | 20 | 3.5 | 2.9 | [3,4,21,22] |
| 26 | El Colosco/Chile/2006 | ✓ |  |  | ✓ | ✓ | ✓ |  |  |  |  | PT | 1 | 1 | 45,360 | 36,500 | 400 | 0.45 | 17 | 4.3 | 3.4 | [3,4,59] |
| 27 | Singspring/Singapore/2005 | ✓ |  |  | ✓ |  | ✓ |  | ✓ |  |  | DWEER | 2 (partial two pass) | 1 | 136,400 | 31,600 | 250 | 0.405 | 31 | 4.34 | 3.1 | [3,4,10,31,32] |
| 28 | Aguilas-Guadalentin/Spain/2013 | ✓ |  | ✓ | ✓ |  | ✓ | ✓ |  |  |  | DWEER | 2 (partial two pass) | 1 | 212,000 | 39,500 | 400 | 0.405 | 20 | 4.6 | 2.9 | [3,4] |
| 29 | Alicante II/Spain/2008 |  | ✓ |  | ✓ |  |  | ✓ |  |  |  | PX | 1 | 1 | 50,000 | 38,000 | 400 | 0.43 | 20 | 3.8 | 2.5 | [3,4,6] |
| 30 | Barcelona (Llobregat)/Spain/2009 | ✓ |  | ✓ | ✓ |  | ✓ | ✓ |  |  |  | PX | 2 (partial two pass) | 1 | 200,000 | 39,700 | 130 | 0.3825 | 19 | 4.2 | 2.6 | [3,4,11] |
| 31 | Valdelentisco/Spain/2010 | ✓ |  | ✓ | ✓ | ✓ |  |  |  |  |  | PX | 1 | 2 | 140,000 | 39,000 | 400 | 0.5 | 21 | 3.7 | 3.1 | [3,4,60] |
| 32 | Al Dur/Bahrain/2012 | ✓ |  | ✓ | ✓ |  |  | ✓ |  |  |  | PT | 2 | 1 | 218,000 | 47,000 | 200 | 0.378 | 28 | 5.4 | 4.7 | [3,4,61,62] |
| 33 | Palmachim/Israel/2007 | ✓ |  | ✓ | ✓ |  |  | ✓ |  |  |  | PT | 2 (SPSP) | 1 | 110,000 | 42,000 | 300 | 0.441 | 25 | 3.5 | 2.9 | [3,4,63,64] |
| 34 | Sadra/Saudi Arabia/2016 | ✓ |  |  | ✓ |  | ✓ |  | ✓ |  |  | PX | 2 (Full/partial two pass) | 1 | 178,600 | 45,000 | 40 | 0.405 | 27 | 4.4 | 3.1 | [3,4,65,66] |
| 35 | Shuqaiq/Saudi Arabia/2009 | ✓ |  |  | ✓ | ✓ |  | ✓ |  |  |  | PT | 2 | 1 | 212,000 | 37,100 | 30 | 0.36 | 29 | 4.4 | --- | [3,4,29,30] |
| 36 | Yunbu/Saudi Arabia/2006 | ✓ |  |  | ✓ | ✓ |  | ✓ |  |  |  | PT | 1 | 1 | 50,400 | 46,400 | 500 | 0.39 | 28 | 5.2 | --- | [3,4,67] |
| 37 | Ghalilah/UAE/2015 | ✓ |  |  | ✓ |  | ✓ |  | ✓ |  |  | PX | 1 | 1 | 68200 | 42000 | 500 | 0.4 | 27 | 3 | --- | [3,4,66,68] |
| 38 | Sorek/Israel/2013 | ✓ |  |  | ✓ |  |  | ✓ |  |  |  | DWEER | 2 (SPSP) | 1 | 540,000 | 40,800 | 300 | 0.45 | 25 | 3.5 | 2.7 | [3,4,69,70] |
| 39 | Tampa Bay/USA/2007 | ✓ |  | ✓ | ✓ | ✓ |  |  |  |  |  | --- | 2 | 1 | 108,831 | 30,500 | 200 | 0.43 | 24.4 | 3 | --- | [34–36] |

**References:**

[1] A.R. Evenden, Sea water reverse osmosis - energy efficiency &amp; recovery, Water Pract Technol. 10 (2015) 187–195. https://doi.org/10.2166/wpt.2015.023.

[2] V. Ayala, T. Kildea, J. Artal, Adelaide Desalination Plant outfall diffuser performance validation, Desalination Water Treat. 55 (2015) 2543–2554. https://doi.org/10.1080/19443994.2014.946729.

[3] J. Kim, K. Park, D.R. Yang, S. Hong, A comprehensive review of energy consumption of seawater reverse osmosis desalination plants, Appl Energy. 254 (2019). https://doi.org/10.1016/j.apenergy.2019.113652.

[4] DesalData, Global Water Intelligence, (2023).

[5] Y. Fernández-Torquemada, J.L. Sánchez-Lizaso, J.M. González-Correa, Preliminary results of the monitoring of the brine discharge produced by the SWRO desalination plant of Alicante (SE Spain), Desalination. 182 (2005) 395–402. https://doi.org/10.1016/j.desal.2005.03.023.

[6] R. Navarro, A. Carratalá, J.L. Sánchez Lizaso, The Cost of Brine Dilution in the Desalination Plants of Alicante, Water (Basel). 13 (2021). https://doi.org/10.3390/w13172386.

[7] A.F. Marchena, Efficiency improvement of seawater desalination processes: The case of the W.E.B. Aruba N.V. on the island of Aruba, (2013). https://doi.org/10.3990/1.9789036501279.

[8] Desalination Plant Profile: Aruba: the Pearl of the Caribbean, (2010).

[9] L.F. Greenlee, D.F. Lawler, B.D. Freeman, B. Marrot, P. Moulin, Reverse osmosis desalination: Water sources, technology, and today’s challenges, Water Res. 43 (2009) 2317–2348. https://doi.org/10.1016/J.WATRES.2009.03.010.

[10] A. Efraty, Closed circuit desalination series no-6: conventional RO compared with the conceptually different new closed circuit desalination technology, Desalination Water Treat. 41 (2012) 279–295. https://doi.org/10.1080/19443994.2012.664741.

[11] M.A. Sanz, C. Miguel, The role of SWRO Barcelona-Llobregat Plant in the water supply system of Barcelona Area, Desalination Water Treat. 51 (2013) 111–123. https://doi.org/10.1080/19443994.2012.699250.

[12] S. Vigneswaran, Water and wastewater treatment technologies, EOLSS Publications, 2009.

[13] J.B. Graham, MARINE BIOLOGICAL CONSIDERATIONS RELATED TO THE REVERSE OSMOSIS DESALINATION PROJECT AT THE ENCINA POWER PLANT, CARLSBAD, CA, 2005.

[14] Nikolay Voutchkov, SWRO desalination process: on the beach – seawater intakes, Stamford, CT, 2005.

[15] Fujairah seawater reverse osmosis desalination plant (United Arab Emirates), (n.d.). https://www.suezwaterhandbook.com/case-studies/desalination/Fujairah-seawater-reverse-osmosis-desalination-plant-United-Arab-Emirates (accessed August 19, 2020).

[16] M.A. Sanza, V. Bonnélyea, G. Cremerb, Fujairah reverse osmosis plant: 2 years of operation, Desalination. 203 (2007) 91–99. https://doi.org/10.1016/j.desal.2006.03.526.

[17] P. Baudish, Design Considerations for Tunnelled Seawater Intakes, in: B. and M.R.G. Missimer Thomas M. and Jones (Ed.), Intakes and Outfalls for Seawater Reverse-Osmosis Desalination Facilities, Springer International Publishing, Cham, 2015: pp. 19–38.

[18] Gold Coast Desalination Plant, Queensland, (n.d.). https://www.water-technology.net/projects/gold-coast-plant/ (accessed August 19, 2020).

[19] K.K.Mehrotra, The quest to quench India’s thirst for Industrial / drinking  water requirement, n.d. http://www.iim-delhi.com/upload_events/DesalinationTechnology.pdf (accessed October 25, 2022).

[20] M. Faigon, Y. Egozy, D. Hefer, M. Ilevicky, Y. Pinhas, Hadera desalination plant two years of operation, Desalination Water Treat. 51 (2013) 132–139. https://doi.org/10.1080/19443994.2012.701414.

[21] G. Kaiser, N. Voutchkov, SUSTAINABLE MANAGEMENT OF DESALINATION PLANT CONCENTRATE-DESALINATION INDUSTRY POSITION PAPER-ENERGY AND ENVIRONMENT COMMITTEE OF THE INTERNATIONAL DESALINATION ASSOCI.... SUSTAINABLE MANAGEMENT OF DESALINATION PLANT CONCENTRATE-DESALINATION INDUSTRY POSITION PAPER-ENERGY AND ENVIRONMENT COMMITTEE OF THE INTERNATIONAL DESALINATION ASSOCIATION (IDA) Presenter, 2019. https://www.researchgate.net/publication/336879311.

[22] R. Stover, G. Crisp, ENVIRONMENTALLY SOUND DESALINATION AT THE PERTH SEAWATER DESALINATION PLANT, 2008. https://www.researchgate.net/publication/228480681.

[23] K. Zotalis, E.G. Dialynas, N. Mamassis, A.N. Angelakis, Desalination technologies: Hellenic experience, Water (Switzerland). 6 (2014) 1134–1150. https://doi.org/10.3390/w6051134.

[24] Stacy Rodriguez, SWRO desalination plant supplies high-quality water in Trinidad, (2003). https://www.waterworld.com/home/article/16200491/swro-desalination-plant-supplies-highquality-water-in-trinidad (accessed August 19, 2020).

[25] K.H. Chu, J. Lim, S.J. Kim, T.U. Jeong, M.H. Hwang, Determination of optimal design factors and operating conditions in a large-scale seawater reverse osmosis desalination plant, J Clean Prod. 244 (2020). https://doi.org/10.1016/j.jclepro.2019.118918.

[26] A.D. Khawaji, I.K. Kutubkhanah, J.M. Wie, A 13.3 MGD seawater RO desalination plant for Yanbu Industrial City, Desalination. 203 (2007) 176–188. https://doi.org/10.1016/j.desal.2006.02.018.

[27] Sanjeev Unni, Membrane technology: Quality water in unique locations, (2009). https://www.filtsep.com/content/features/membrane-technology-quality-water-in-unique-locations (accessed October 25, 2022).

[28] L.R. Rodríguez, Feasibility Analysis of a Seabed Filtration Intake System for the Shoaiba III Expansion Reverse Osmosis Plant, (2012). https://doi.org/10.25781/KAUST-35M9E.

[29] V. van der Mast, F. Muddassir Mubeen, T. Altmann, T. Attenborough, T. Hori, Y. Ito, H. Iwahashi, New Shuqaiq SWRO Desalination Plant with Advance BWRO Process, 2007.

[30] N. Nada, T. Attenborough, Y. Ito, Y. Maeda, K. Tokunaga, H. Iwahashi, SWRO Drinking Water Project in Shuqaiq: Advanced BWRO, Membrane Oxidation, and Scaling, IDA Journal of Desalination and Water Reuse. 3 (2011) 30–39. https://doi.org/10.1179/ida.2011.3.4.30.

[31] C. Huttche, R. Orquiza, Y.P. Lelean, Pollution Control Study for Tuas Desalination and Power Plant Project, Environmental Professionals. (2011).

[32] G. Micale, L. Rizzuti, A. Cipollina, Seawater Desalination, Springer Berlin Heidelberg, 2009. https://doi.org/10.1007/978-3-642-01150-4.

[33] T. Fanjul, A. Aparicio, V. Martín, R. Segovia, J. Salas, Engineering design of Skikda Seawater Desalination Plant, Desalination Water Treat. 7 (2009) 206–213. https://doi.org/10.5004/dwt.2009.708.

[34] N.J. Harvey, Z. ur Rehman, T.O. Leiknes, N. Ghaffour, H. Urakawa, T.M. Missimer, Organic compounds and microbial assessment of a seawater reverse osmosis facility at Tampa Bay Water, USA, Desalination. 496 (2020). https://doi.org/10.1016/j.desal.2020.114735.

[35] R.B. Coffin, M.T. Montgomery, C.L. Osburn, Impact of a Hydrate-Based Marine Desalination Technology on Marine Microbiota and Water Quality, 2006.

[36] A. Martorell, P. Miranda, I. Beneyto, R. Fernandez, E. Palacios, E. Ferrero Presenter, IDAWC15-Martorell TAMPA BAY DESALINATION PLANT-7 YEARS OF O&M IDAWC15-Martorell TAMPA BAY DESALINATION PLANT-7 YEARS OF O&M IDAWC15-Martorell, 2015. https://www.researchgate.net/publication/328228241.

[37] Chennai metropolitan water supply and sewerage board, n.d. https://cmwssb.tn.gov.in/ (accessed August 19, 2020).

[38] Minjur Desalination Plant, Tamil Nadu, India, (n.d.). https://www.water-technology.net/projects/minjurdesalination/ (accessed August 19, 2020).

[39] H.E. Abdulrahman M. Al-Ibrahim, Desalination: An Outlook of Hope for Prosperous and Sustainable Future, Desalination Water Treat. 55 (2015) 2267–2269. https://doi.org/10.1080/19443994.2014.963932.

[40] N. Oussama, H. Bouabdesselam, N. Ghaffour, L. Abdelkader, Characterization of seawater reverse osmosis fouled membranes from large scale commercial desalination plant, Chemistry International. 5 (2019) 158–167. http://www.bosaljournals.com/index.php/chemint/article/view/146 (accessed August 19, 2020).

[41] A. Natarajan, Addressing Water Scarcity in Tamilnadu: New Perspective, in: L. and G.G. and P.L. and N.A. and H.S. Pannirselvam Muthu and Shu (Ed.), Water Scarcity and Ways to Reduce the Impact: Management Strategies and Technologies for Zero Liquid Discharge and Future Smart Cities, Springer International Publishing, Cham, 2019: pp. 187–195. https://doi.org/10.1007/978-3-319-75199-3_10.

[42] K.K. Mehrotra, Desalination : The quest to quench India’s thirst for Industrial / drinking water requirement by K.K.Mehrotra , Former CMD, MECON Limited, (n.d.).

[43] M. Fariñas, L.Á. López, New and innovative sea water intake system for the desalination plant at San Pedro del Pinatar, Desalination. 203 (2007) 199–217. https://doi.org/10.1016/j.desal.2006.01.036.

[44] J.C. Hernández-Sánchez, N. Boluda-Botella, J.L. Sánchez-Lizaso, The role of desalination in water management in southeast Spain, Desalination Water Treat. 76 (2017) 71–76. https://doi.org/10.5004/dwt.2017.20657.

[45] K. TANAKA, K. MATSUI, T. HORI, H. IWAHASHI, K. TAKEUCHI, Y. ITO, World’s First Large Full Triple-Pass RO Seawater Desalination Plant KENJI TANAKA KATSUNORI MATSUI TAKAYOSHI HORI HIDEO IWAHASHI KAZUHISA TAKEUCHI YOSHIAKI ITO, Mitsubishi Heavy Industries Technical Review. 46 (2009) 12.

[46] C. Bartels, S. Cioffi, S. Rybar, M. Wilf, E. Koutsakos, Long term experience with membrane performance at the Larnaca desalination plant, Desalination. 221 (2008) 92–100. https://doi.org/10.1016/j.desal.2007.01.070.

[47] E. Koutsakos, K. Savvides, K. Savva, Larnaca desalination plant operation - A client and contractor perspective, Desalination. 184 (2005) 157–164. https://doi.org/10.1016/j.desal.2005.03.061.

[48] O.L. Villa Sallangos, Operating experience of the Dhekelia seawater desalination plant using an innovative energy recovery system, Desalination. 173 (2005) 91–102. https://doi.org/10.1016/j.desal.2004.07.045.

[49] Tom Freyberg, €130m seawater desalination plant ready for business in Almeria, Spain, (2015). https://www.waterworld.com/home/article/16202603/130m-seawater-desalination-plant-ready-for-business-in-almeria-spain (accessed August 19, 2020).

[50] Bajo Almanzora Desalination Plant, Almeria, (n.d.). https://www.water-technology.net/projects/bajo-almanzora-desalination-plant (accessed August 19, 2020).

[51] N. Fujiwara, H. Matsuyama, High recovery system in seawater reverse osmosis plants, J Appl Polym Sci. 108 (2008) 3403–3410.

[52] The largest seawater desalination plant in Japan is operating well - Toyobo Co, Ltd., n.d. https://www.toyobo-global.com/seihin/ro/pdf/holosep20050817e.pdf (accessed August 19, 2020).

[53] A. Shimokawa, Desalination plant with Unique Methods in FUKUOKA, in: Japan-US Governmental Conference on Drinking Water Quality Management and Wastewater Control, Las Vegas, N, 2009. https://www.niph.go.jp/soshiki/suido/pdf/h21JPUS/abstract/r9-2.pdf (accessed August 19, 2020).

[54] S.-M. Park, J. Han, S. Lee, J. Sohn, Y.-M. Kim, J.-S. Choi, S. Kim, Analysis of reverse osmosis system performance using a genetic programming technique, Desalination Water Treat. 43 (2012) 281–290. https://doi.org/10.1080/19443994.2012.672201.

[55] Y. Kim, S. Ihm, S. Woo, Energy efficiency improvement of Gijang SWRO plant in Busan, Korea, Desalination Water Treat. 112 (2018) 258–277. https://doi.org/10.5004/dwt.2018.22146.

[56] M.-H. Hwang, I.S. Kim, Comparative Analysis of Seawater Desalination Technology in Korea and Overseas, Journal of Korean Society of Environmental Engineers. 38 (2016) 255–268. https://doi.org/10.4491/KSEE.2016.38.5.255.

[57] Melbourne seawater reverse osmosis desalination plant (Australia), (n.d.). https://www.suezwaterhandbook.com/case-studies/desalination/Melbourne-seawater-reverse-osmosis-desalination-plant-Australia (accessed August 19, 2020).

[58] Partnerships Victoria Project Summary Victorian Desalination Project Artist’s impression: General View to the West-Victorian Desalination Plant, 2009. https://www.dtf.vic.gov.au/sites/default/files/2018-01/Project-Summary-for-Victorian-Desalination-Project.pdf (accessed August 19, 2020).

[59] M. Petry, M.A. Sanz, C. Langlais, V. Bonnelye, J.P. Durand, D. Guevara, W.M. Nardes, C.H. Saemi, The El Coloso (Chile) reverse osmosis plant, Desalination. 203 (2007) 141–152. https://doi.org/10.1016/j.desal.2006.05.007.

[60] M. Latorre, Boron experience at 53 MGD Valdelentisco SWRO plant, in: Dubai, UAE, 2009. http://www.desaliawater.com/pdf/DB09-036.pdf (accessed August 19, 2020).

[61] Al Dur seawater reverse osmosis desalination plant (Bahrain), (n.d.). https://www.suezwaterhandbook.com/case-studies/desalination/Al-Dur-seawater-reverse-osmosis-desalination-plant-Bahrain (accessed August 19, 2020).

[62] S. le Gallou, S. Bertrand, K.H. Madan, Al Dur SWRO plant: a double challenge for pre- and post-treatments, Desalination Water Treat. 51 (2013) 101–110. https://doi.org/10.1080/19443994.2012.694235.

[63] R. Stover, J.M. Pinto, R.L. Stover, Expansion Retrofit of the Via Maris Palmachim Seawater Reverse Osmosis Plant, 2009. https://www.researchgate.net/publication/266604177.

[64] A. Yechiel, Y. Shevah, Optimization of energy costs for SWRO desalination plants, Desalination Water Treat. 46 (2012) 304–311. https://doi.org/10.1080/19443994.2012.677561.

[65] Sadara SWRO Plant - Saudi Arabia, (n.d.). https://www.sidem-desalination.com/about-sidem/main-latest-references/sadara-swro-plant-saudi-arabia (accessed August 19, 2020).

[66] J. Kim, K. Park, S. Hong, Application of two-stage reverse osmosis system for desalination of high-salinity and high-temperature seawater with improved stability and performance, Desalination. 492 (2020). https://doi.org/10.1016/j.desal.2020.114645.

[67] A.D. Khawaji, I.K. Kutubkhanah, J.M. Wie, A 13.3 MGD seawater RO desalination plant for Yanbu Industrial City, Desalination. 203 (2007) 176–188. https://doi.org/10.1016/j.desal.2006.02.018.

[68] R.L. Stover, A. Ameglio, P.A.K. Khan, The Ghalilah SWRO plant: An overview of the solutions adopted to minimize energy consumption, Desalination. 184 (2005) 217–221. https://doi.org/10.1016/j.desal.2005.03.059.

[69] F. Lokiec, SOREK 150 MILLION M3/YEAR SEAWATER DESALINATION FACILITY BUILD, OPERATE AND TRANSFER (BOT) PROJECT, 2011.

[70] Sorek Desalination Plant, (n.d.). https://www.water-technology.net/projects/sorek-desalination-plant/ (accessed August 19, 2020).

[71] B. Martinez, Jorf Lasfar: The Largest SWRO Desalination Plant in Morocco, (2012).

[72] N. Voutchkov, Desalination Project Cost Estimating and Management, CRC Press, 2018. https://doi.org/10.1201/9781351242738.

[73] N. Melián-Martel, J.J. Sadhwani, S. Malamis, M. Ochsenkühn-Petropoulou, Structural and chemical characterization of long-term reverse osmosis membrane fouling in a full scale desalination plant, Desalination. 305 (2012) 44–53. https://doi.org/https://doi.org/10.1016/j.desal.2012.08.011.

[74] V.G. Gude, Sustainable desalination handbook: plant selection, design and implementation, Butterworth-Heinemann, 2018.

[75] Global Water. Intelligence (GWI) & International Desalination Association (IDA), The IDRA – Desalination & Reuse Handbook 2021-2022 & 2023-2024, 2024.

[76] DesalData, Global Water Intelligence. (2021).

[77] Donald.M. Anderson, S.F.E. Boerlage, M.B. Dixon, Harmful Algal Blooms (HABs) and Desalination: a Guide to Impacts, Monitoring and Management., Intergovernmental Oceangraphic Commission Manuals and Guides. 78 (2017). http://dx.doi.org/10.25607/OBP-203.

[78] R.L. Burk, M.B. Dixon, D. Kim-Hak, P.M. Vega, A COMPARISON OF THREE REVERSE OSMOSIS MEMBRANES AT LA CHIMBA DESALINATION PLANT, ANTOFAGASTA, CHILE, (2013).

[79] Water-Technology, Campo de Dalías Reverse Osmosis Desalination Plant, 2023. https://www.water-technology.net/projects/campo-de-dalas-reverse-osmosis-desalination-plant/.

[80] C. Gasson, C. Gonzalez-Manchon, F. Alvarado-Revilla, Desalination Markets, 2010. https://www.waterstones.com/book/desalination-markets-2010/christopher-gasson/clara-gonzalez-manchon/9781907467110 (accessed November 23, 2023).

[81] Tuas Seawater Desalination Plant, (n.d.). https://www.water-technology.net/projects/tuas-seawater-desalination/ (accessed August 19, 2020).

[82] Amiad Provides Water Filtration Solutions To Singapore’s Third Desalination Plant, (2018). https://www.wateronline.com/doc/amiad-provides-water-filtration-solutions-to-singapore-s-third-desalination-plant-0001 (accessed August 19, 2020).

[83] M. Yuen Teen, Corporate Governance Case Studies, 2019. https://governanceforstakeholders.com/2019/10/02/corporate-governance-case-studies-volume-8/ (accessed November 22, 2023).

[84] N. Quevedo, J. Sanz, C. Ocen, A. Lobo, J. Temprano, I. Tejero, Reverse osmosis pretreatment alternatives: Demonstration plant in the seawater desalination plant in Carboneras, Spain, Desalination. 265 (2011) 229–236. https://doi.org/10.1016/j.desal.2010.07.056.

[85] A.A. Bakr, W.A. Makled, New pretreatment media filtration for SWRO membranes of desalination plants, Desalination Water Treat. 55 (2015) 718–730. https://doi.org/10.1080/19443994.2014.944219.

[86] R. Stover, J. Martin, Titan PX-1200 Energy Recovery device — test results from the Inima Los Cabos, Mexico, seawater RO facility, Desalination Water Treat. 3 (2009) 179–182. https://doi.org/10.5004/dwt.2009.458.

[87] S. Meyer-Steele, A. von Gottberg, J.L. Talavera, Seawater Reverse Osmosis Plants in the Caribbean Recover Energy and Brine and Reduce Costs, GE Power & Water. (2012). https://silo.tips/download/seawater-reverse-osmosis-plants-in-the-caribbean-recover-energy-and-brine-and-re#.

[88] R. Lemes, R. Falcon, R. Arocha, J. Curbelo, V. Platas, L. De Lorenzo, Different designs in energy savings of SWRO Plant of Las Palmas III, Desalination Water Treat. 51 (2013) 749–758. https://doi.org/10.1080/19443994.2012.699342.

[89] I. El Saliby, Y. Okour, H.K. Shon, J. Kandasamy, I.S. Kim, Desalination plants in Australia, review and facts, Desalination. 247 (2009) 1–14. https://doi.org/10.1016/j.desal.2008.12.007.

[90] R. Stover, M. Angel Sanz, R.L. Stover, Energy efficiency in Perth’s desalination plant Membrane brine concentration View project Desalitech View project Low Energy Consumption in the Perth Seawater Desalination Plant, 2007. https://www.researchgate.net/publication/296769620.

[91] L.F. Greenlee, D.F. Lawler, B.D. Freeman, B. Marrot, P. Moulin, Reverse osmosis desalination: Water sources, technology, and today’s challenges, Water Res. 43 (2009) 2317–2348. https://doi.org/10.1016/j.watres.2009.03.010.

[92] Ashkelon Seawater Reverse Osmosis (SWRO) Plant, Israel, (n.d.). https://www.water-technology.net/projects/israel/ (accessed August 19, 2020).

[93] C. Fritzmann, J. Löwenberg, T. Wintgens, T. Melin, State-of-the-art of reverse osmosis desalination, Desalination. 216 (2007) 1–76. https://doi.org/10.1016/j.desal.2006.12.009.

[94] L.F. Greenlee, D.F. Lawler, B.D. Freeman, B. Marrot, P. Moulin, Reverse osmosis desalination: Water sources, technology, and today’s challenges, Water Res. 43 (2009) 2317–2348. https://doi.org/10.1016/j.watres.2009.03.010.

[95] S. Li, Z. Li, Reverse osmosis and forward osmosis in desalination membrane systems, in: Current Trends and Future Developments on (Bio-) Membranes: Reverse and Forward Osmosis: Principles, Applications, Advances, Elsevier Inc., 2019: pp. 281–303. https://doi.org/10.1016/B978-0-12-816777-9.00012-5.
